# Supplementary figures and images for: Physiological Changes of Arabica Coffee under Different Intensities and Durations of Water Stress in the Brazilian Cerrado
Source: MDPI journal article supplement (doi:10.3390/plants11172198), 2022-08-25

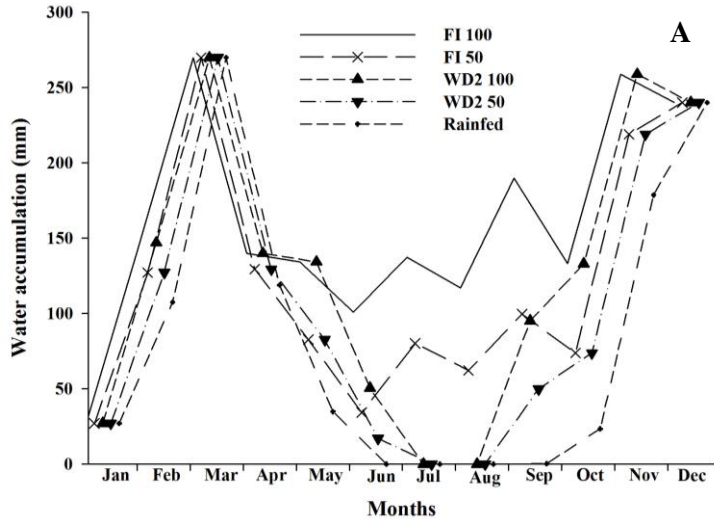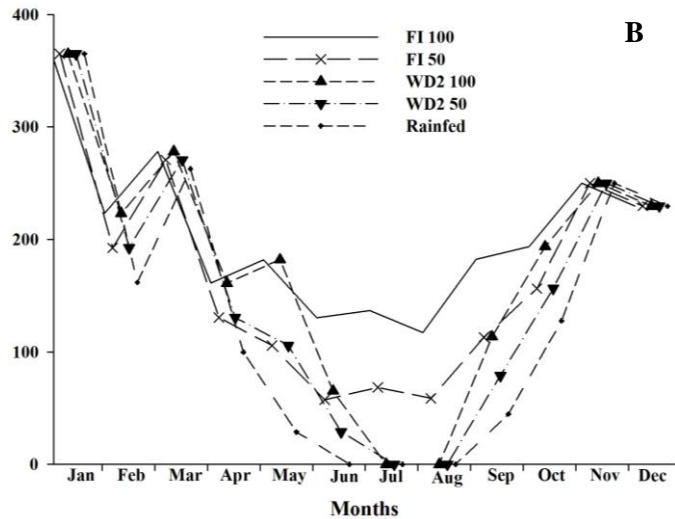

Supplement: s1 [file s1]

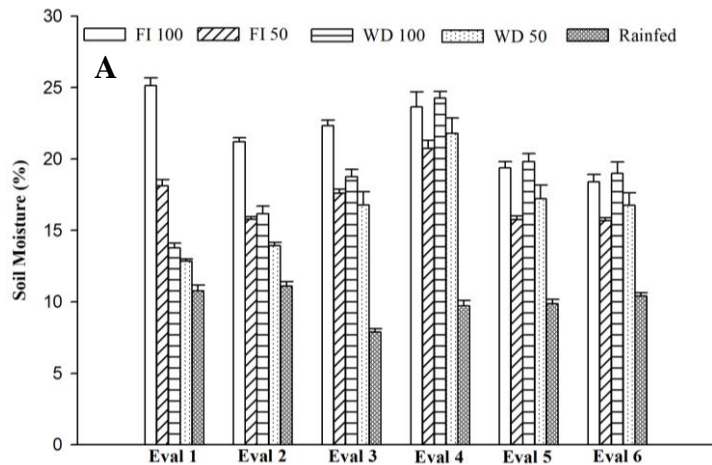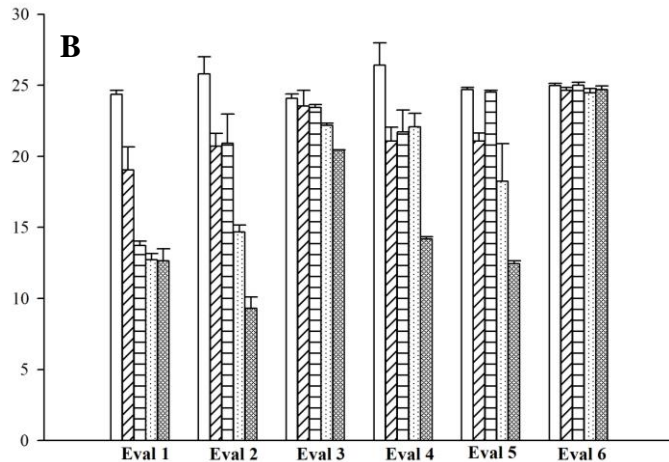

Supplement: s1 [file s1]
